# Supplementary material for: CCR2-positive monocytes contribute to the pathogenesis of early diabetic retinopathy in mice
Source: Springer Nature journal article supplement (doi:10.1007/s00125-022-05860-w), 2023-01-26
Supplement: MOESM1 [file 125_2022_5860_MOESM1_ESM.pdf]

Title:

**CCR2-positive monocytes contribute to the pathogenesis of early diabetic retinopathy in mice**

Aicha Saadane<sup>1</sup>, Alexander A. Veenstra<sup>2</sup>, Martin S. Minns<sup>3</sup>, Jie Tang<sup>4</sup>, Yunpeng Du<sup>1</sup>, Fatima Abubakr Elghazali<sup>1</sup>, Emma M. Lessieur<sup>1</sup>, Eric Pearlman<sup>3</sup>, Timothy S. Kern<sup>1,5</sup>

<sup>1</sup>Department of Ophthalmology, University of California-Irvine, Irvine, CA, USA

<sup>2</sup>Case Western Reserve University, Cleveland, OH, USA

<sup>3</sup>Institute for Immunology, University of California-Irvine, Irvine, CA, USA

<sup>4</sup>Department of Pharmacology, Case Western Reserve University, Cleveland, OH, USA

<sup>5</sup>Veterans Administration Medical Center Research Service, Long Beach, CA, USA

ORCID ID:

Aicha Saadane **0000-0001-9985-2147**

Correspondence to: Aicha Saadane, [asaadane@hs.uci.edu](mailto:asaadane@hs.uci.edu)

Received: 17 May 2022 / Accepted: 13 September 2022

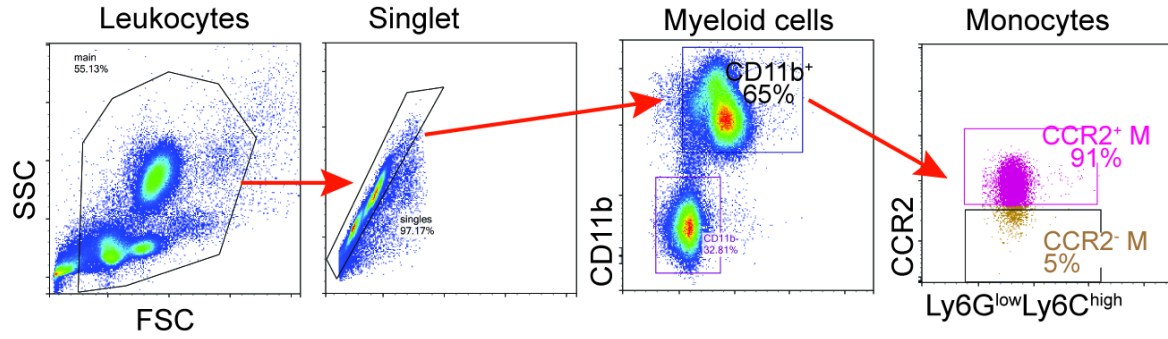

ESM Fig.1 Gating strategy of the flow cytometry for identifying monocyte subsets. FSC and SSC identified total leukocytes, CD11b<sup>+</sup> identified myeloid cells and CD11b, Ly6G and Ly6C staining identified monocytes as CD11b<sup>+</sup>Ly6G<sup>low</sup>Ly6C<sup>high</sup> and CCR2 further identified monocytes as CCR2<sup>+</sup> or CCR2<sup>-</sup>. SSC, side scatter; FSC, forward scatter.

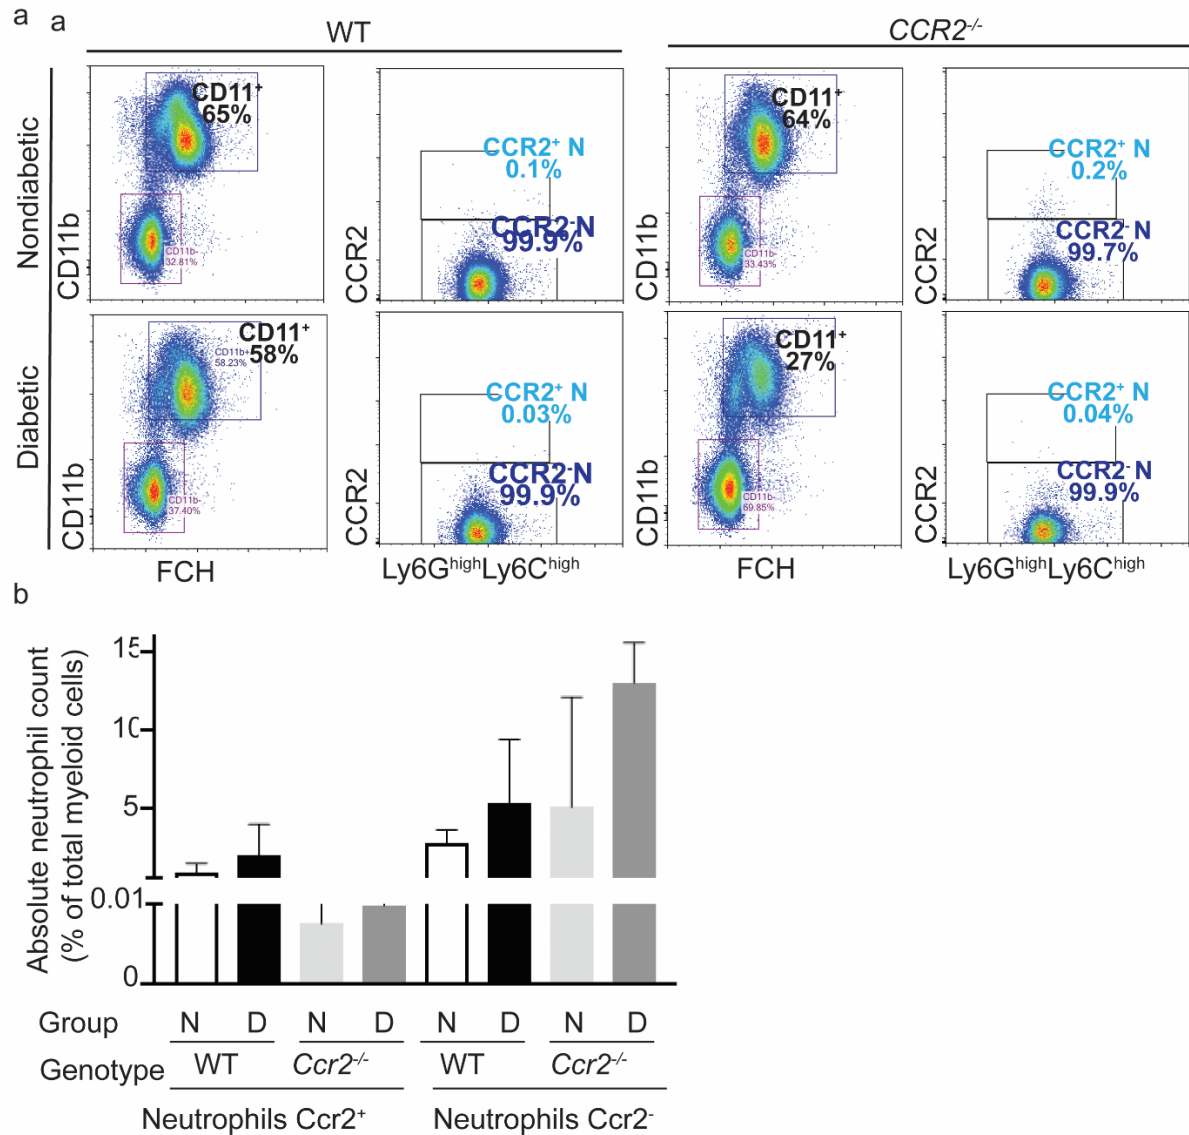

**Supplementary Figure 2.** Effect of *Ccr2* deficiency and diabetes on Neutrophils distribution. FSC and SSC identified total leukocytes, CD11b<sup>+</sup> identified myeloid cells and CD11b, Ly6G<sup>hi</sup> and Ly6C staining identified neutrophils as CD11b<sup>+</sup>Ly6G<sup>hi</sup>Ly6C<sup>hi</sup> and CCR2 further identified neutrophils as CCR2<sup>+</sup> or CCR2<sup>-</sup>. Flow cytometry of the blood of nondiabetic and diabetic mice of WT and *Ccr2*<sup>-/-</sup> mice (a). Absolute numbers of monocytes were normalized to the total number of myeloid cells (b). Mean  $\pm$  SD. N, nondiabetic; D, diabetic.
